# Supplementary material for: Characterization and Analysis of the Skin Microbiota in Acne: Impact of Systemic Antibiotics
Source: PubMed Central journal article supplement (PMC7019264; doi:10.3390/jcm9010168), 2020-01-08
Supplement: jcm-09-00168-s001.pdf [file jcm-09-00168-s001.pdf]

**Table S1.** Demographic and Clinical Characteristics of the Study Participants in detail.

| No. | Sex | Age | Race  | IGA score (before) | IGA score (after) | Prior treatment at baseline               | Use of lotions and makeup* |
|-----|-----|-----|-------|--------------------|-------------------|-------------------------------------------|----------------------------|
| 1   | M   | 14  | Asian | 3                  | 2                 | None                                      | None/ None                 |
| 2   | F   | 14  | Asian | 3                  | 1                 | None                                      | None/ Lotion               |
| 3   | M   | 14  | Asian | 3                  | 1                 | None                                      | Lotion/ None               |
| 4   | M   | 13  | Asian | 3                  | 2                 | None                                      | None/ None                 |
| 5   | F   | 26  | Asian | 3                  | 2                 | Oral doxy last taken 3 months ago         | None/ None                 |
| 6   | F   | 23  | Asian | 3                  | 1                 | None                                      | None/ None                 |
| 7   | F   | 13  | Asian | 3                  | 2                 | None                                      | None/ None                 |
| 8   | M   | 18  | Asian | 4                  | 2                 | Oral doxy last taken 7 months ago         | None/ None                 |
| 9   | F   | 25  | Asian | 3                  | 1                 | Oral roxithromycin last taken 3 years ago | None/ None                 |
| 10  | M   | 11  | Asian | 3                  | 2                 | None                                      | None/ None                 |
| 11  | F   | 12  | Asian | 3                  | 2                 | None                                      | None/ None                 |
| 12  | M   | 23  | Asian | 3                  | 2                 | Oral doxy last taken 2 months ago         | None/ None                 |
| 13  | M   | 25  | Asian | 4                  | 2                 | Oral doxy last taken 5 years ago          | None/ None                 |
| 14  | F   | 22  | Asian | 4                  | 3                 | Oral doxy last taken 6 months ago         | Lotion/ None               |
| 15  | F   | 18  | Asian | 4                  | 3                 | None                                      | None/ None                 |
| 16  | M   | 44  | Asian | 3                  | 2                 | Oral doxy last taken 4 months ago         | None/ None                 |
| 17  | F   | 24  | Asian | 3                  | 2                 | Oral doxy last taken 2 years ago          | None/ None                 |
| 18  | M   | 15  | Asian | 3                  | 2                 | None                                      | None/ None                 |
| 19  | F   | 15  | Asian | 3                  | 2                 | Oral doxy last taken 1 year ago           | None/ None                 |
| 20  | M   | 23  | Asian | 4                  | 2                 | None                                      | Lotion/ None               |

\*Use of lotion and makeup on the skin the day of sampling (baseline, after doxycycline) noted by subject

**Table S2.** Sample read counts.

| Sample No | Before/ After Doxycycline | Read Count (CD-HIT-OUT) |
|-----------|---------------------------|-------------------------|
| 1         | Before                    | 164,611                 |
|           | After                     | 204,225                 |
| 2         | Before                    | 127,667                 |
|           | After                     | 141,707                 |
| 3         | Before                    | 181,178                 |
|           | After                     | 148,717                 |
| 4         | Before                    | 155,291                 |
|           | After                     | 136,972                 |
| 5         | Before                    | 146,360                 |
|           | After                     | 117,788                 |
| 6         | Before                    | 169,996                 |
|           | After                     | 129,478                 |
| 7         | Before                    | 159,777                 |
|           | After                     | 166,527                 |
| 8         | Before                    | 162,885                 |
|           | After                     | 157,468                 |
| 9         | Before                    | 150,501                 |
|           | After                     | 136,144                 |
| 10        | Before                    | 149,869                 |
|           | After                     | 163,871                 |
| 11        | Before                    | 122,086                 |
|           | After                     | 163,483                 |
| 12        | Before                    | 177,030                 |
|           | After                     | 140,143                 |
| 13        | Before                    | 151,230                 |
|           | After                     | 173,296                 |
| 14        | Before                    | 106,806                 |
|           | After                     | 157,419                 |
| 15        | Before                    | 135,024                 |
|           | After                     | 175,975                 |
| 16        | Before                    | 172,405                 |
|           | After                     | 143,355                 |
| 17        | Before                    | 136,349                 |
|           | After                     | 135,118                 |
| 18        | Before                    | 192,559                 |
|           | After                     | 153,847                 |
| 19        | Before                    | 150,898                 |
|           | After                     | 36,149                  |
| 20        | Before                    | 128,910                 |
|           | After                     | 133,329                 |

**Table S3.** Bacterial genera (with relative abundance of greater than 0.1% across all samples) and species with significantly higher mean relative abundance (A) before and (B) after doxycycline treatment.

A

| Genera               | Fold-increase | P value | 95% CI     |
|----------------------|---------------|---------|------------|
| <i>Cutibacterium</i> | 1.82          | 0.02    | 2.3% - 21% |
| <i>Snodgrassella</i> | 3.85          | 0.006   | 0.2% - 24% |

| Species                    | Fold-increase | P value | 95% CI     |
|----------------------------|---------------|---------|------------|
| <i>Cutibacterium acnes</i> | 1.96          | 0.02    | 3% - 22%   |
| <i>Snodgrassella alvi</i>  | 3.85          | 0.006   | 0.2% - 24% |

B

| Species                         | Fold-increase | P value | 95% CI       |
|---------------------------------|---------------|---------|--------------|
| <i>Cutibacterium granulosum</i> | 4.46          | 0.02    | 0.04% - 0.9% |

**Table S4.** Bacterial genera (with relative abundance of greater than 0.1% across all samples) and species with significant difference in relative abundance between the two age groups (Under 20, Over 20) at baseline. All showed a higher relative abundance in the Under 20 age group.

| Genera                                    | Fold-increase | P value | 95% CI           |
|-------------------------------------------|---------------|---------|------------------|
| <i>Staphylococcus</i>                     | 2.85          | 0.004   | 7.3% - 28%       |
| <i>Corynebacterium</i>                    | 3.77          | 0.01    | 0.55% - 6.25%    |
| <i>Streptococcus</i>                      | 6.58          | 0.01    | 0.4% - 6.89%     |
| Species                                   | Fold-increase | P value | 95% CI           |
| <i>Staphylococcus epidermidis</i>         | 2.85          | 0.004   | 7.3% - 28%       |
| <i>Corynebacterium matruchotii</i>        | 76            | 0.002   | 0.02% - 0.71%    |
| <i>Corynebacterium durum</i>              | 16            | 0.004   | 0.006% - 0.14%   |
| <i>Corynebacterium tuberculostearicum</i> | 4.89          | 0.006   | 0.44% - 4.59%    |
| <i>Streptococcus thermophilus</i>         | 5.49          | 0.008   | 0.01% - 0.27%    |
| <i>Streptococcus dentisani</i>            | 7.63          | 0.01    | 0.41% - 6.51%    |
| <i>Corynebacterium timonense</i>          | 4.59          | 0.0497  | 0.00003% - 0.15% |

**Table S5.** Bacterial genera (with relative abundance of greater than 0.1% across all samples) and species with significant difference in relative abundance between the Male and Female group at baseline. *Pseudomonas* showed a higher relative abundance in Female subjects.

| Genera                    | Fold-increase | P value | 95% CI        |
|---------------------------|---------------|---------|---------------|
| <i>Pseudomonas</i>        | 12            | 0.007   | 0.07% - 4.08% |
| Species                   | Fold-increase | P value | 95% CI        |
| <i>Pseudomonas putida</i> | 34            | 0.0002  | 0.04% - 0.15% |

**Table S6.** Bacterial genera (with relative abundance of greater than 0.1% across all samples) and species with significant difference in relative abundance between acne severity (IGA) 3 and IGA 4 group at baseline. All showed a higher relative abundance in the IGA 4 subjects.

| Genera                           | Fold-increase | P value | 95% CI         |
|----------------------------------|---------------|---------|----------------|
| <i>Cutibacterium</i>             | 2.03          | 0.02    | 4.53% - 44%    |
| <i>Lawsonella</i>                | 6.44          | 0.0009  | 1.49% - 11%    |
| Species                          | Fold-increase | P value | 95% CI         |
| <i>Cutibacterium acnes</i>       | 2.02          | 0.02    | 4.54% - 42%    |
| <i>Lawsonella clevelandensis</i> | 6.46          | 0.0009  | 1.51% - 11%    |
| <i>Cutibacterium namnetense</i>  | 23            | 0.009   | 0.0001% - 0.2% |

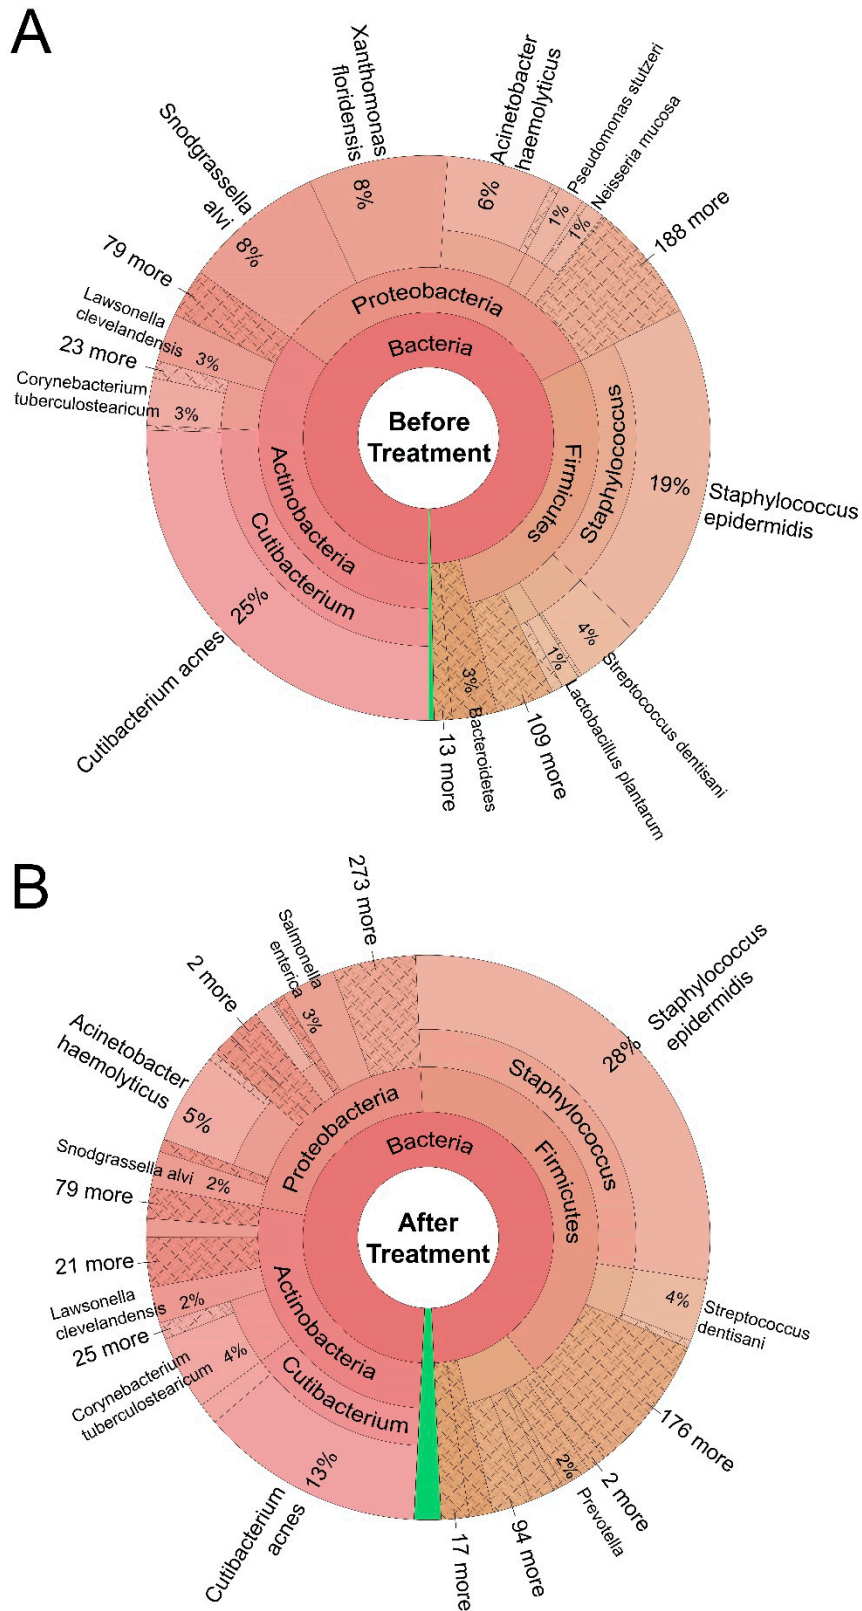

**Figure S1.** Krona graph on skin microbiota in acne patients (A) Before treatment, and (B) After 6 weeks of doxycycline.

A

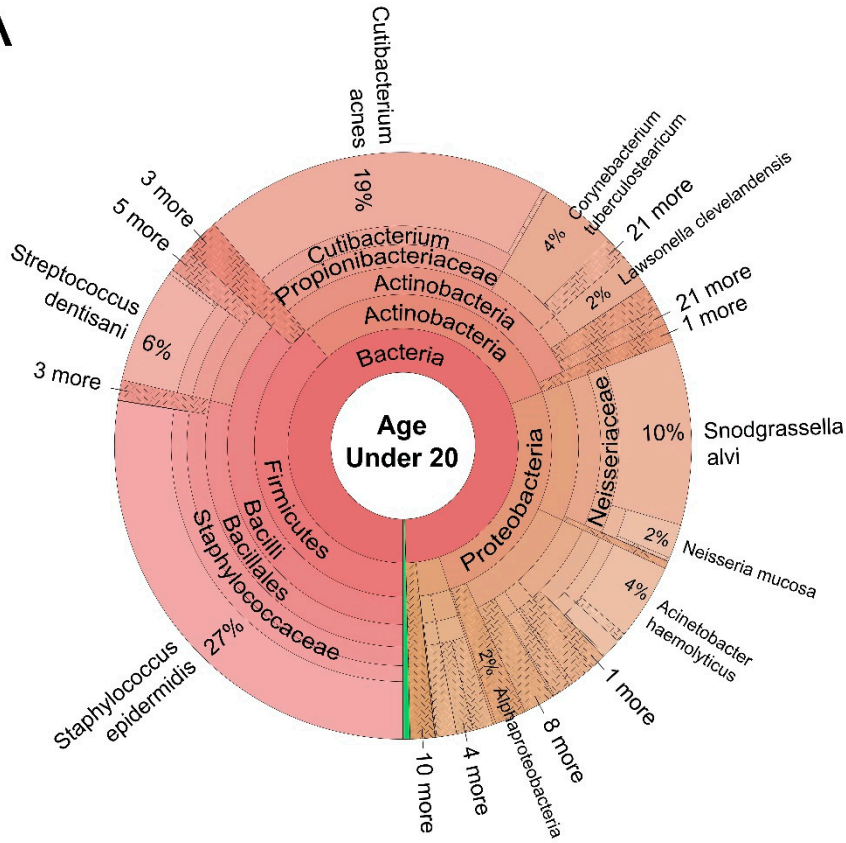

B

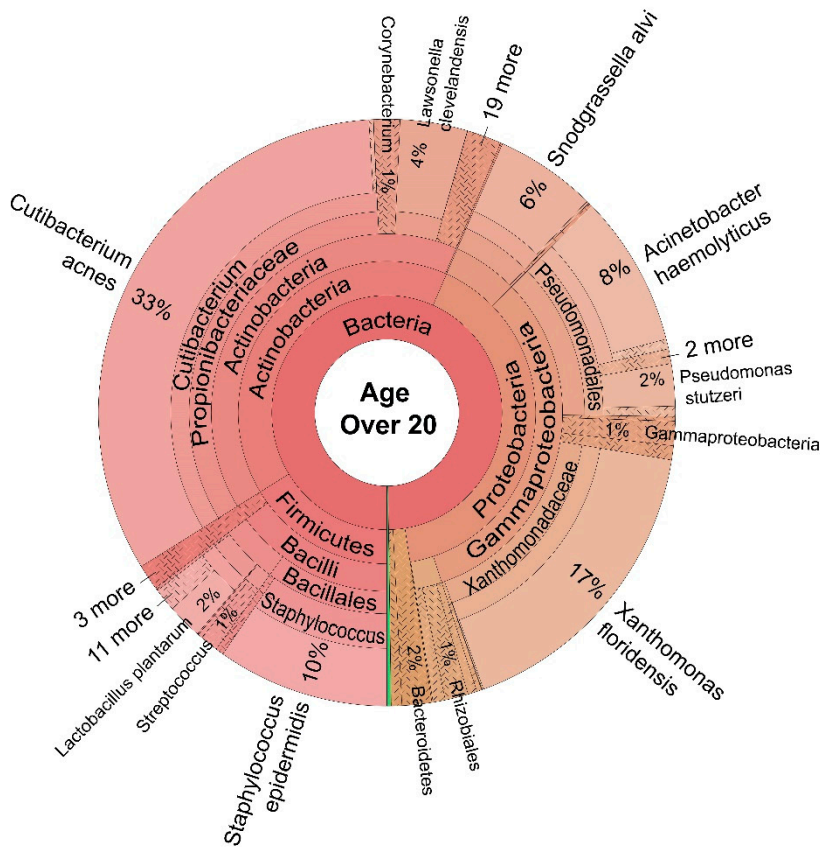

**Figure S2.** Krona graph on baseline skin microbiota in acne patients (A) Under 20, and (B) Over 20 years of age.





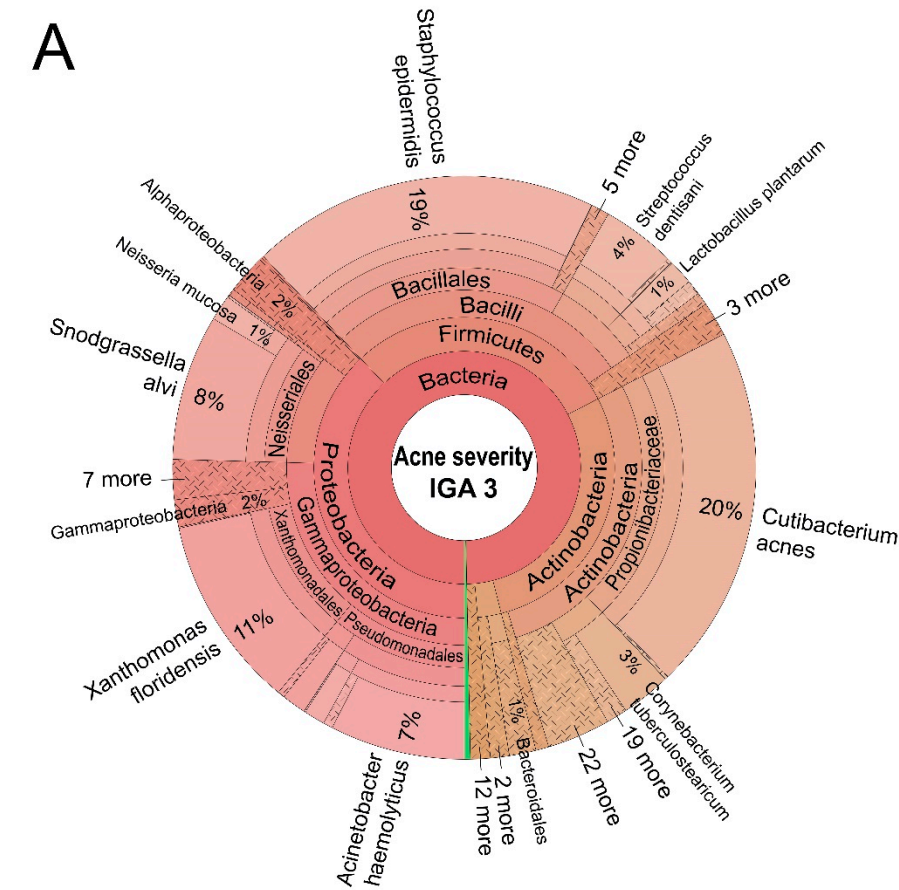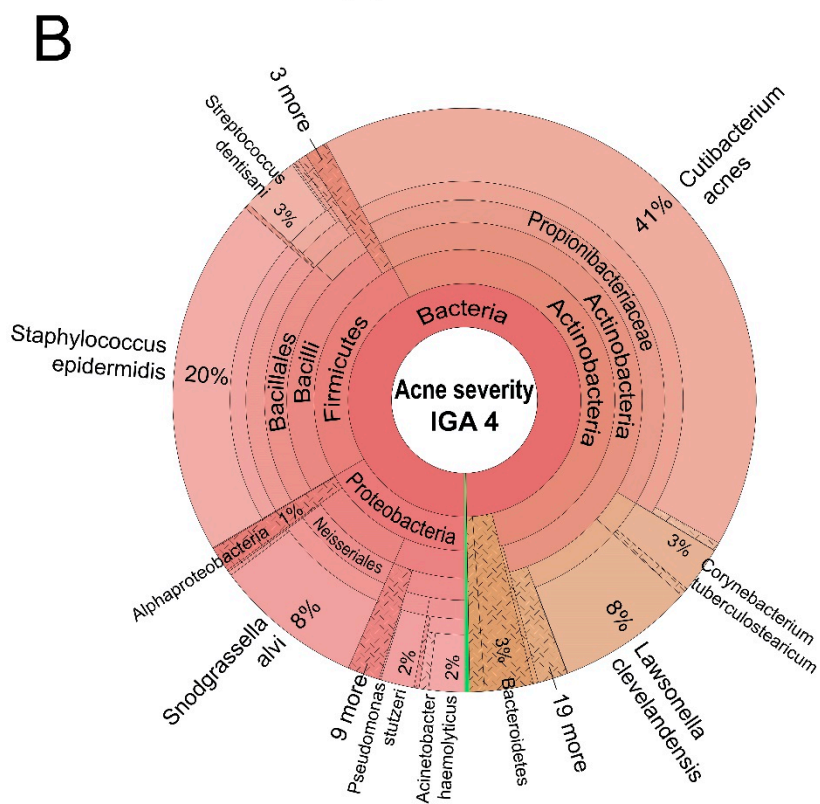

**Figure S4.** Krona graph on baseline skin microbiota according to acne severity. (A) IGA 3, and (B) IGA 4.
